# Supplementary material
Source: Springer Nature journal article supplement (https://www.springermedizin.de/resource/supplementary/12936_2011_2136_MOESM3_ESM.pdf/9542794)

# Primaquine total dose per body weight

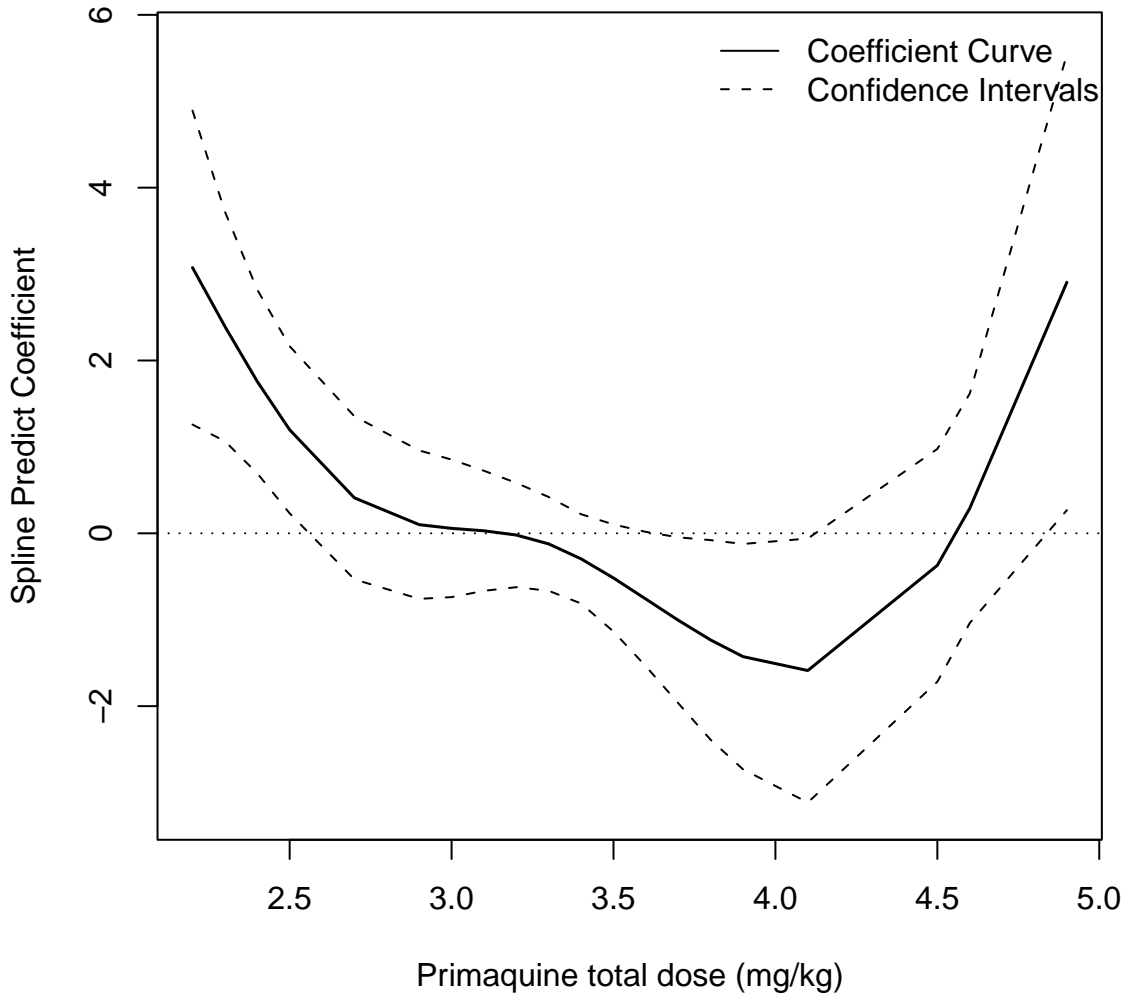

Supplement: MOESM3 [file 9542794]
